# Supplementary material for: Understanding effects of precursor solution aging in triple cation lead perovskite
Source: Royal Society of Chemistry journal article supplement (doi:10.1039/c8ra03471k), 2018-01-01
Supplement: c8ra03471k1.pdf [file c8ra03471k1.pdf]

## Supporting Information

### Understanding Effects of Precursor Solution Aging in Triple Cation Lead Perovskite

Passarut Boonmongkolras<sup>a</sup>, Daehan Kim<sup>a</sup>, Esra M. Alhabshi<sup>b</sup>, Issam Gereige<sup>b</sup>, Byungha Shin<sup>a\*</sup>

<sup>a</sup> Department of Material Science and Engineering, Korea Advanced Institute of Technology, Daejeon 34141, Korea

<sup>b</sup> Saudi Aramco Research & Development Center, Dhahran 31311, Kingdom of Saudi Arabia

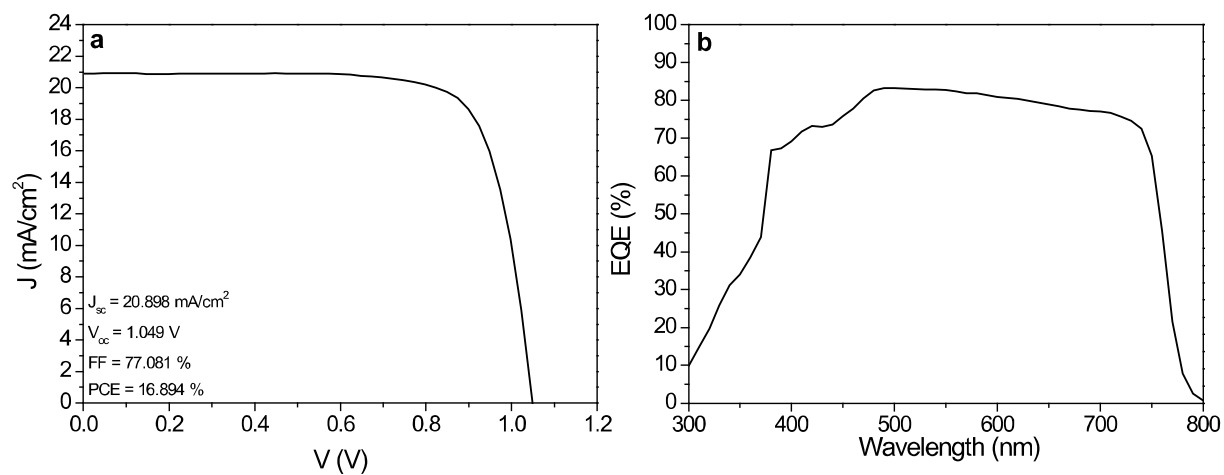

**Figure S1:** Device performance (a) JV curve and (b) EQE of the best performing cell.

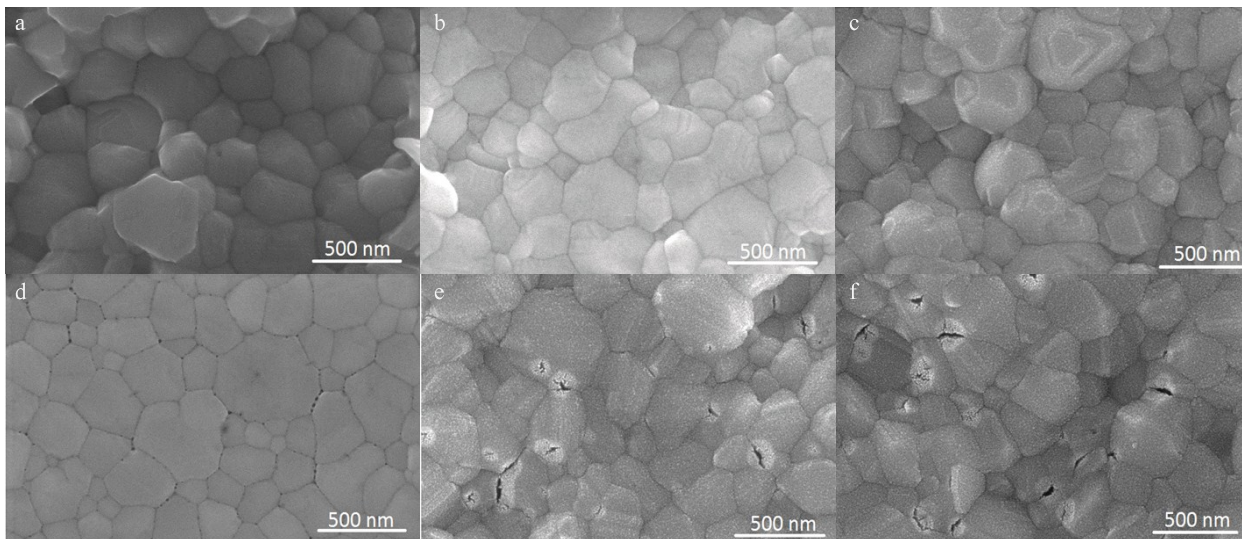

**Figure S2:** SEM images of the films fabricated from different triple cation lead halide perovskite solution where (a) – (f) are 2, 6, 24, 72, 168, and 720 hr, respectively.

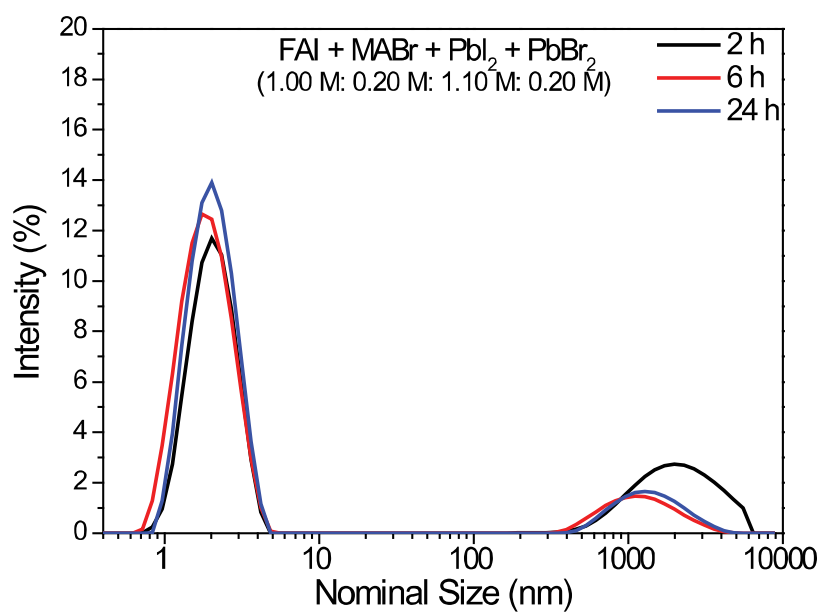

**Figure S3:** DLS data of the precursor solution containing FAI + MABr + PbI<sub>2</sub> + PbBr<sub>2</sub> with respect to its aging time.

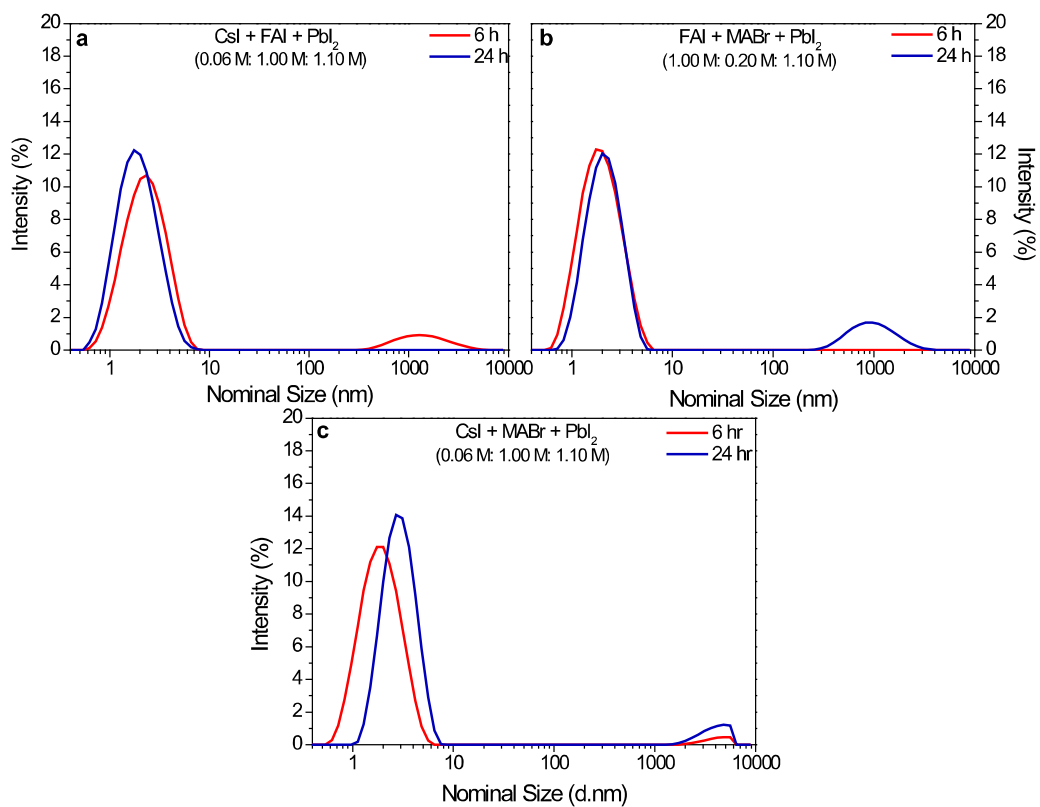

**Figure S4:** DLS data of the precursor solution containing (a) CsI + FAI + PbI<sub>2</sub>, (b) FAI + MABr + PbI<sub>2</sub>, and (c) CsI + MABr + PbI<sub>2</sub> with respect to its aging time.

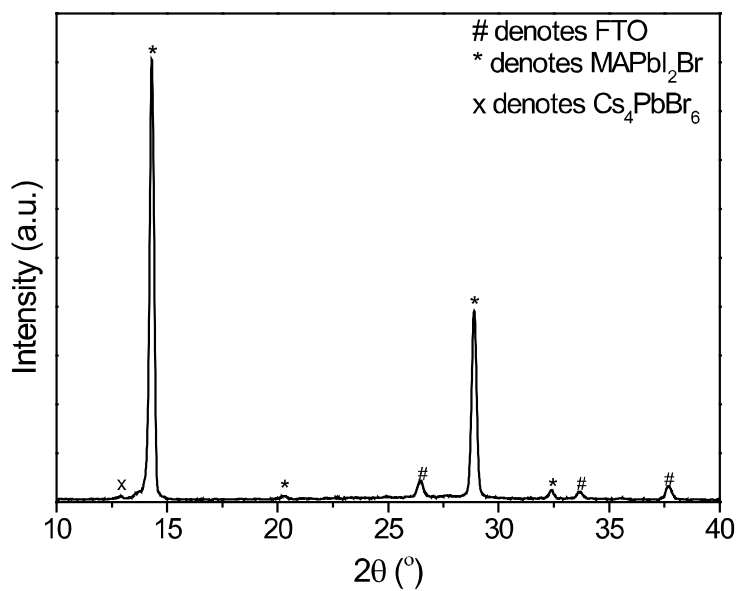

**Figure S5:** XRD pattern of MAPbI<sub>2</sub>Br perovskite film with addition of CsI. The amount of CsI added was equal to the amount added in triple cation precursor solution.

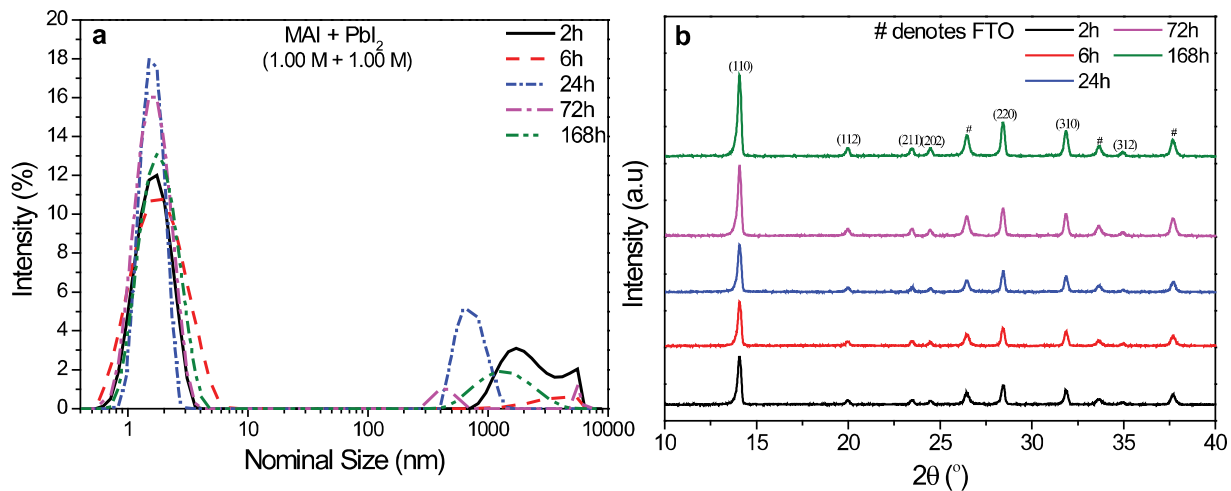

**Figure S6:** (a) DLS and (b) XRD data of MAPbI<sub>3</sub> with respect to its perovskite precursor solution aging time.

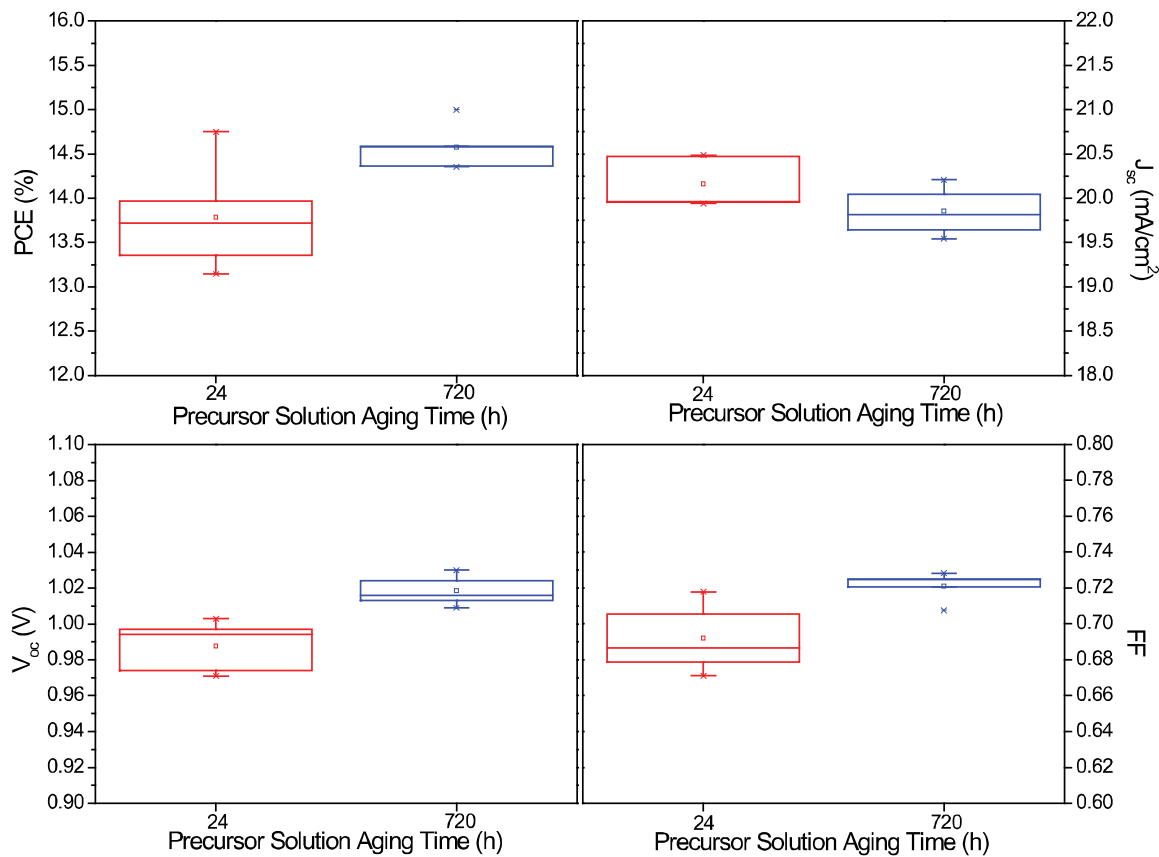

**Figure S7:** Device distribution of MAPbI<sub>3</sub> perovskite with different precursor solution aging time.

| Input Precursors                                                                          | Cation: Lead: Halide Molar Ratio<br>(A: B: X Molar Ratio) | 6 h | 24 h | 72 h or more |
|-------------------------------------------------------------------------------------------|-----------------------------------------------------------|-----|------|--------------|
| FAI + PbI <sub>2</sub> + MABr + PbBr <sub>2</sub><br>+ CsI<br>(Triple-cation Lead Halide) | 1.26: 1.30: 3.86                                          | X   | O    | O            |
| FAI + PbI <sub>2</sub> + MABr + PbBr <sub>2</sub>                                         | 1.20: 1.30: 3.80                                          | O   | O    | O            |
| FAI + PbBr <sub>2</sub>                                                                   | 1.00: 1.10: 3.20                                          | O   | O    | O            |
| MABr + PbBr <sub>2</sub>                                                                  | 1.00: 1.10: 3.20                                          | X   | O    | O            |
| FAI + PbI <sub>2</sub>                                                                    | 1.00: 1.10: 3.20                                          | O   | O    | O            |
| MABr + PbI <sub>2</sub>                                                                   | 1.00: 1.10: 3.20                                          | X   | O    | O            |
| CsI + FAI + PbI <sub>2</sub>                                                              | 1.06: 1.10: 3.26                                          | O   | X    | O            |
| MABr + FAI + PbI <sub>2</sub>                                                             | 1.20: 1.10: 3.40                                          | X   | O    | O            |

**Table 1:** Summary of DLS experiments with different combinations of the precursors. The label “O” indicates the existence of the large aggregates within the precursor solution and “X” indicates no large aggregates.
